# Supplementary material for: Risk of Early Childhood Obesity in Offspring of Women with Preeclampsia: A Population-Based Study
Source: MDPI journal article supplement (doi:10.3390/jcm10163758), 2021-08-23
Supplement: s1 [file s1]

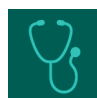

## Supplementary Material

**Supplementary Table S1.** ICD-10 Code for pre-pregnancy hypertension and pre-pregnancy diabetes mellitus.

|                            | Code | Description                                   |
|----------------------------|------|-----------------------------------------------|
| Pre pregnancy hypertension | I10  | Essential (primary) hypertension              |
|                            | I11  | Hypertensive heart disease                    |
|                            | I12  | Hypertensive chronic kidney disease           |
|                            | I13  | Hypertensive heart and chronic kidney disease |
|                            | I15  | Secondary hypertension                        |
| Pre pregnancy diabetes     | E10  | Type 1 diabetes mellitus                      |
|                            | E11  | Type 2 diabetes mellitus                      |
|                            | E12  | Malnutrition-related diabetes mellitus        |
|                            | E13  | Other specified diabetes mellitus             |
|                            | E14  | Unspecified diabetes mellitus                 |

**Supplementary Table S2.** Body mass index of male offspring up to 80 months of age stratified according to maternal preeclampsia (PE).

| Age          | Offspring born to women without PE | Offspring born to women with PE | <i>p</i> |
|--------------|------------------------------------|---------------------------------|----------|
| 30–42 months | 16.12 (15.33–16.99)                | 16.11 (15.29–17.00)             | 0.1946   |
| 42–54 months | 15.99 (15.21–16.84)                | 16.01 (15.19–16.96)             | 0.0367   |
| 54–66 months | 15.87 (15.06–16.81)                | 15.94 (15.07–16.98)             | <0.0001  |
| 66–80 months | 15.89 (15.01–17.03)                | 16.07 (15.06–17.47)             | <0.0001  |

**Supplementary Table S3.** Body mass index of female offspring up to 80 months of age stratified according to maternal preeclampsia (PE).

| Age          | Offspring born to women without PE | Offspring born to women with PE | <i>p</i> |
|--------------|------------------------------------|---------------------------------|----------|
| 30–42 months | 15.87 (15.06–16.75)                | 15.83 (14.99–16.76)             | 0.0063   |
| 42–54 months | 15.81 (15.02–16.69)                | 15.82 (14.96–16.73)             | 0.5986   |
| 54–66 months | 15.67 (14.88–16.66)                | 15.78 (14.87–16.81)             | <0.0001  |
| 66–80 months | 15.72 (14.84–16.82)                | 15.83 (14.84–17.10)             | <0.0001  |

**Supplementary Table S4.** Prevalence and associations between maternal history of preeclampsia (PE) and underweight and obese male offspring until 80 months of age.

| Age          | Offspring born to women without PE | Offspring born to women with PE | <i>p</i> | Unadjusted OR (95% CI) | Adjusted* OR (95% CI) |
|--------------|------------------------------------|---------------------------------|----------|------------------------|-----------------------|
| Obesity      |                                    |                                 |          |                        |                       |
| 30–40 months | 39752/507959 (7.8%)                | 886/9593 (9.2%)                 | <0.0001  | 1.19(1.11–1.28)        | 1.31 (1.22–1.41)      |
| 42–54 months | 57064/494254 (11.5%)               | 1352/9477 (14.3%)               | <0.0001  | 1.27(1.20–1.35)        | 1.36 (1.28–1.45)      |
| 54–66 months | 54775/458204 (12.0%)               | 1382/8901 (15.5%)               | <0.0001  | 1.35(1.27–1.43)        | 1.38 (1.30–1.47)      |
| 66–80 months | 41310/322135 (12.8%)               | 1071/6107 (17.5%)               | <0.0001  | 1.44(1.35–1.54)        | 1.42 (1.33–1.52)      |
| Underweight  |                                    |                                 |          |                        |                       |
| 30–40 months | 48436/507959 (9.5%)                | 1081/9593 (11.3%)               | <0.0001  | 1.20(1.13–1.28)        | 0.98 (0.925–1.05)     |
| 42–54 months | 35779/494254 (7.2%)                | 819/9477 (8.6%)                 | <0.0001  | 1.21(1.12–1.30)        | 0.97 (0.907–1.05)     |
| 54–66 months | 33988/458204 (7.4%)                | 741/8901 (8.3%)                 | 0.0012   | 1.13(1.05–1.22)        | 0.94 (0.872–1.02)     |
| 66–80 months | 28126/322135 (8.7%)                | 582/6107 (9.5%)                 | 0.0286   | 1.10(1.01–1.20)        | 0.93(0.857–1.02)      |

**Supplementary Table S5.** Prevalence and associations between maternal history of preeclampsia (PE) and underweight and obese female offspring until 80 months of age.

| Age          | Offspring born to women without PE | Offspring born to women with PE | <i>p</i> | Unadjusted OR (95% CI) | Adjusted* OR (95% CI) |
|--------------|------------------------------------|---------------------------------|----------|------------------------|-----------------------|
| Obesity      |                                    |                                 |          |                        |                       |
| 30–40 months | 37950/477033 (8.0%)                | 855/9663 (8.8%)                 | 0.0013   | 1.12(1.05-1.20)        | 1.24(1.15-1.33)       |
| 42–54 months | 56234/464249 (12.1%)               | 1351/9566 (14.1%)               | <0.0001  | 1.19(1.13-1.27)        | 1.30(1.23-1.38)       |
| 54–66 months | 56640/432240 (13.1%)               | 1456/8985 (16.2%)               | <0.0001  | 1.28(1.21-1.36)        | 1.35(1.27-1.43)       |
| 66–80 months | 40607/304450 (13.3%)               | 1107/6297 (17.6%)               | <0.0001  | 1.39(1.30-1.48)        | 1.41(1.32-1.51)       |
| Underweight  |                                    |                                 |          |                        |                       |
| 30–40 months | 49007/477033 (10.3%)               | 1139/9663 (11.8%)               | <0.0001  | 1.17(1.10-1.24)        | 0.93(0.87-0.99)       |
| 42–54 months | 34141/464249 (7.4%)                | 899/9566 (9.4%)                 | <0.0001  | 1.31(1.22-1.40)        | 1.03(0.96-1.11)       |
| 54–66 months | 31364/432240 (7.3%)                | 750/8985 (8.3%)                 | <0.0001  | 1.16(1.08-1.26)        | 0.94(0.87-1.01)       |
| 66–80 months | 23758/304450 (7.8%)                | 589/6297 (9.4%)                 | <0.0001  | 1.22(1.12-1.33)        | 1.01(0.92-1.10)       |
